# Supplementary material for: Liver-Specific Commd1 Knockout Mice Are Susceptible to Hepatic Copper Accumulation
Source: PubMed Central journal article supplement (PMC3245254; doi:10.1371/journal.pone.0029183), 2011-12-22
Supplement: pone.0029183.s005.pdf [file pone.0029183.s005.pdf]

**Table S2. Biological parameters of *Commd1*<sup>loxP/loxP</sup> and *Commd1*<sup>Δhep</sup> mice fed a high Cu diet, starting at an age of 6 weeks**

| High Cu diet (wks)            | 3                                  |                               | 6                                  |                               | 28                                 |                               | 40                                 |                               | 52                                 |                               |
|-------------------------------|------------------------------------|-------------------------------|------------------------------------|-------------------------------|------------------------------------|-------------------------------|------------------------------------|-------------------------------|------------------------------------|-------------------------------|
|                               | <i>Commd1</i> <sup>loxP/loxP</sup> | <i>Commd1</i> <sup>Δhep</sup> | <i>Commd1</i> <sup>loxP/loxP</sup> | <i>Commd1</i> <sup>Δhep</sup> | <i>Commd1</i> <sup>loxP/loxP</sup> | <i>Commd1</i> <sup>Δhep</sup> | <i>Commd1</i> <sup>loxP/loxP</sup> | <i>Commd1</i> <sup>Δhep</sup> | <i>Commd1</i> <sup>loxP/loxP</sup> | <i>Commd1</i> <sup>Δhep</sup> |
| <b>Total body weight (g)</b>  | 25.6 ± 1.7                         | 21.3 ± 2.8                    | 22.9 ± 2.8                         | 22.8 ± 4.5                    | 27.4 ± 4.9                         | 31.0 ± 8.1                    | 30.9 ± 8.0                         | 30.3 ± 8.6                    | 29.4 ± 7.4                         | 38.6 ± 5.3                    |
| <b>Liver weight (mg)</b>      | 1.14 ± 0.2                         | 1.01 ± 0.16                   | 1.06 ± 0.24                        | 1.09 ± 0.38                   | 1.12 ± 0.23                        | 1.39 ± 0.43                   | 1.31 ± 0.49                        | 1.36 ± 0.6                    | 1.21 ± 0.31                        | 1.76 ± 0.2                    |
| <b>Hepatic Cu conc (μg/g)</b> | 25.8 ± 10.7                        | 195.8 ± 58.9                  | 28.5 ± 6.5                         | 338.3 ± 82.4***               | 9.2 ± 3.0                          | 265.2 ± 69.9****              | 12.9 ± 3.9                         | 291.9 ± 157.2*                | 16.4 ± 3.8                         | 164.2 ± 75.9***               |
| <b>Ceruloplasmin (U/ml)</b>   | 2.13 ± 0.3                         | 2.2 ± 1.1                     | 3.6 ± 2.3                          | 3.5 ± 0.9                     | 1.7 ± 0.8                          | 2.8 ± 0.7*                    | 3.7 ± 1.4                          | 5.2 ± 1.4*                    | 4.8 ± 2.4                          | 8.2 ± 1.6**                   |
| <b>GOT (U/L)</b>              | 79.5 ± 10.3                        | 100.5 ± 23.9                  | 91.6 ± 17.2                        | 72.3 ± 14.2                   | 78.3 ± 12.8                        | 95.1 ± 20.0                   | 85.6 ± 19.7                        | 89.6 ± 16.1                   | 69.7 ± 11.0                        | 58.5 ± 3.7                    |
| <b>GPT (U/L)</b>              | 37.1 ± 13.3                        | 47.8 ± 20.1                   | 39.2 ± 11.7                        | 38.2 ± 19.5                   | 28.5 ± 9.2                         | 29.7 ± 17.4                   | 52.6 ± 11.4                        | 43.9 ± 12.1                   | 36.8 ± 6.8                         | 24.2 ± 11.8                   |

\*, \*\*, \*\*\*, and \*\*\*\* indicate significantly different values compared to *Commd1*<sup>loxP/loxP</sup> mice (\* p < 0.05, \*\* p < 0.01, \*\*\* p < 0.005, \*\*\*\* p < 0.0005). n = 5 - 8
